# Supplementary material for: Human Amnion Epithelial Cells and Their Derived Exosomes Alleviate Sepsis-Associated Acute Kidney Injury via Mitigating Endothelial Dysfunction
Source: PubMed Central journal article supplement (PMC8989462; doi:10.3389/fmed.2022.829606), 2022-03-24
Supplement: Data_Sheet_1.pdf [file Data_Sheet_1.pdf]

Supplementary Table 1. Mice status scoring

| <b>Key</b>                                                                                      |   |
|-------------------------------------------------------------------------------------------------|---|
| <b>Score</b>                                                                                    |   |
| <b>Mental state</b>                                                                             |   |
| <i>General weakness, malaise, piloerection, avoiding conditioned reflex</i>                     |   |
| Mice have all of the above conditions                                                           | 0 |
| Mice have three of the above conditions                                                         | 1 |
| Mice have two the of above conditions                                                           | 2 |
| Mice have one of the above conditions                                                           | 3 |
| Mice have none of the above conditions                                                          | 4 |
| <b>Autonomous motor activity.</b>                                                               |   |
| <i>Under the condition of knocking the cage</i>                                                 |   |
| Mice have no movement                                                                           | 0 |
| Mice have a few intermittent movements                                                          | 1 |
| Mice have some intermittent movements                                                           | 2 |
| Mice have consistent movements                                                                  | 3 |
| Mice move autonomously                                                                          | 4 |
| <b>Myodynamia</b>                                                                               |   |
| <i>Put mice on the metal cage and pull the tail</i>                                             |   |
| Mice have no grip and are easy to move                                                          | 0 |
| Mice have the action of grip, but are easy to move                                              | 1 |
| Mice have the action of grip and have a sense of moving forward but can't against pulling force | 2 |
| Mice have the action of grip and move forward but can't against the force                       | 3 |
| Mice can grip and move forward actively                                                         | 4 |

Supplementary Table 2 Primer list

| Gene name       | Primers                                                |
|-----------------|--------------------------------------------------------|
| <i>Il1b</i>     | F' GAAATGCCACCTTTTGACAGTG<br>R' TGGATGCTCTCATCAGGACAG  |
| <i>Il6</i>      | F' CTGCAAGAGACTTCCATCCAG<br>R' AGTGGTATAGACAGGTCTGTTGG |
| <i>Il10</i>     | F' AGCCTTATCGGAAATGATCCAGT<br>R' GGCCTTGTAGACACCTTGGT  |
| <i>Tnfa</i>     | F' CCTGTAGCCCACGTCGTAG<br>R' GGGAGTAGACAAGGTACAACCC    |
| <i>Ifng</i>     | F' GCCACGGCACAGTCATTGA<br>R' TGCTGATGGCCTGATTGTCTT     |
| <i>Icam1</i>    | F' TCCGCTACCATCACCGTGTAT<br>R' TAGCCAGCACCGTGAATGTG    |
| <i>Vcam1</i>    | F' TTGGGAGCCTCAACGGTACT<br>R' GCAATCGTTTTGTATTCAGGGGA  |
| <i>Sele</i>     | F' ATGAAGCCAGTGCATACTGTC<br>R' CGGTGAATGTTTCAGATTGGAGT |
| <i>Cdh5</i>     | F' CCACTGCTTTGGGAGCCTT<br>R' GGCAGGTAGCATGTTGGGG       |
| <i>Esm1</i>     | F' CTGGAGCGCCAAATATGCG<br>R' TGAGACTGTACGGTAGCAGGT     |
| <i>Edn1</i>     | F' TTTCCCGTGATCTTCTCTCTGC<br>R' CTGAGTTCGGCTCCCAAGAC   |
| <i>Serpine1</i> | F' TCTGGGAAAGGGTTCACCTTACC<br>R' GACACGCCATAGGGAGAGAAG |
| <i>Plat</i>     | F' TGACCAGGGAATACATGGGAG<br>R' GTCTGCGTTGGCTCATCTCTG   |
| <i>Ang2</i>     | F' AGAATAAGCAAGTCTCGCTTCC<br>R' TGAACCCTTTAGAGGCTCGGT  |

---

*Nos3*

F' TCAGCCATCACAGTGTTCCC  
R' ATAGCCCGCATAGCGTATCAG

*Gapdh*

F' AGGTCGGTGTGAACGGATTTG  
R' GGGGTCGTTGATGGCAACA

*IL1B*

F' ATGATGGCTTATTACAGTGGCAA  
R' GTCGGAGATTCGTAGCTGGA

*IL6*

F' AGGGCTCTTCGGCAAATGTA  
R' GAAGGAATGCCCATTAACAACAA

*IL8*

F' TTTTGCCAAGGAGTGCTAAAGA  
R' AACCTCTGCACCCAGTTTTC

*TNFA*

F' TGTGTGGCTGCAGGAAGAAC  
R' GCAATTGAAGCACTGGAAAAGG

*ACTB*

F' GGCATGGGTCAGAAGGATTCC  
R' ATGTCACGCACGATTTCCCGC

---
